# Supplementary material
Source: MDPI journal article supplement (https://www.mdpi.com/2073-4441/11/8/1667)
Supplement: s1 [file s1]

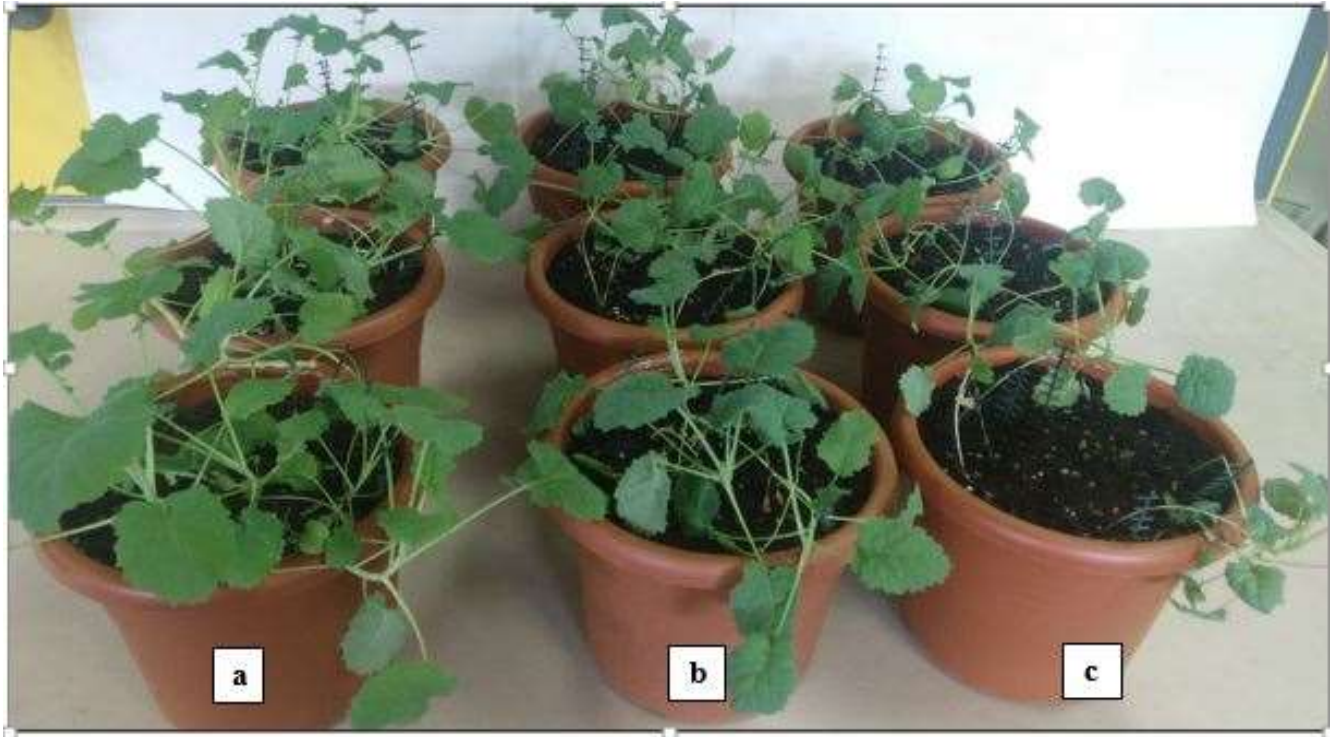

**Figure S1.** Plants of Dynasty after 60 days of treatments: a) control; b) 160 mM NaCl; c) 320 mM NaCl.

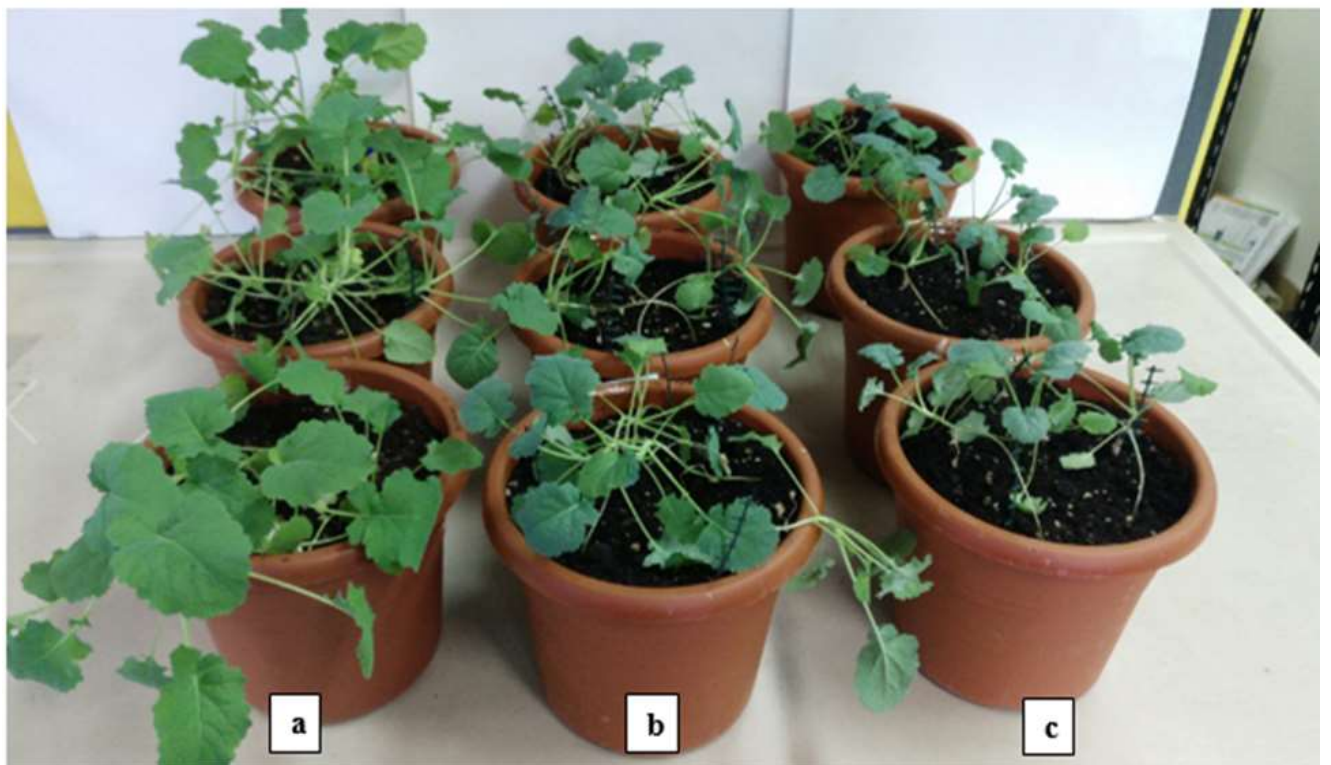

**Figure S2.** Plants of SY Saveo after 60 days of treatments: a) control; b) 160 mM NaCl; c) 320 mM NaCl.

**Table S1.** Effects of salt on the height of the cultivars during the experiments. Data are expressed as means  $\pm$  SE (n  $\geq$  8). Post hoc comparisons conducted with the *Mann-Whitney pairwise comparison test*. Means with different letters are statistically different ( $P \leq 0.05$ ) within the same cultivar.

| <b>Height (cm)</b> |               |                  |                   |                   |                   |
|--------------------|---------------|------------------|-------------------|-------------------|-------------------|
|                    | <b>NaCl</b>   | <b>15 d</b>      | <b>30 d</b>       | <b>45 d</b>       | <b>60 d</b>       |
| <b>SY Saveo</b>    | <b>CTR</b>    | 9.7 $\pm$ 0.32 a | 11.4 $\pm$ 0.40 a | 12.7 $\pm$ 0.42 a | 13.8 $\pm$ 0.39 a |
|                    | <b>160 mM</b> | 9.4 $\pm$ 0.27 a | 10.9 $\pm$ 0.30 a | 11.2 $\pm$ 0.33 b | 11.5 $\pm$ 0.28 b |
|                    | <b>320 mM</b> | 8.9 $\pm$ 0.35 a | 9.8 $\pm$ 0.37 b  | 9.8 $\pm$ 0.44 c  | 9.9 $\pm$ 0.33 c  |
| <b>Dynastie</b>    | <b>CTR</b>    | 9.2 $\pm$ 0.42 a | 11.8 $\pm$ 0.53 a | 13.2 $\pm$ 0.70 a | 14.1 $\pm$ 0.64 a |
|                    | <b>160 mM</b> | 9.1 $\pm$ 0.36 a | 10.9 $\pm$ 0.42 a | 11.4 $\pm$ 0.43 b | 12.1 $\pm$ 0.47 b |
|                    | <b>320 mM</b> | 9.0 $\pm$ 0.32 a | 10.1 $\pm$ 0.29 b | 10.3 $\pm$ 0.38 c | 10.6 $\pm$ 0.32 c |

**Table S2.** Effects of salt on leaf area of Dynastie and SY Saveo during the experiments. Post hoc comparisons conducted with the *Mann-Whitney pairwise comparison test*. Data are expressed as means  $\pm$  SE (n  $\geq$  8). Means with different letters are statistically different ( $P \leq 0.05$ ) within the same cultivar.

| <b>Leaf Area (cm<sup>2</sup>)</b> |               |                  |                  |                   |                   |
|-----------------------------------|---------------|------------------|------------------|-------------------|-------------------|
|                                   | <b>NaCl</b>   | <b>15 d</b>      | <b>30 d</b>      | <b>45 d</b>       | <b>60 d</b>       |
| <b>SY Saveo</b>                   | <b>CTR</b>    | 3.8 $\pm$ 0.39 a | 7.9 $\pm$ 0.97 a | 19.5 $\pm$ 1.7 a  | 29.8 $\pm$ 1.45 a |
|                                   | <b>160 mM</b> | 3.8 $\pm$ 0.34 a | 7.2 $\pm$ 0.71 a | 14.9 $\pm$ 0.63 b | 19.4 $\pm$ 1.30 b |
|                                   | <b>320 mM</b> | 3.7 $\pm$ 0.44 a | 6.8 $\pm$ 0.8 a  | 10.5 $\pm$ 1.5 c  | 11.7 $\pm$ 0.90 c |
| <b>Dynastie</b>                   | <b>CTR</b>    | 5.2 $\pm$ 0.55 a | 9.1 $\pm$ 0.81 a | 25.2 $\pm$ 2.12 a | 34.8 $\pm$ 3.41 a |
|                                   | <b>160 mM</b> | 5.3 $\pm$ 0.28 a | 8.1 $\pm$ 0.38 a | 14.4 $\pm$ 1.05 b | 15.8 $\pm$ 0.52 b |
|                                   | <b>320 mM</b> | 4.7 $\pm$ 0.39 a | 6.5 $\pm$ 0.46 b | 9.4 $\pm$ 0.73 c  | 12.1 $\pm$ 1.18 c |
